# Supplementary material for: The complex-formation behaviour of His residues in the fifth Cu2+ binding site of human prion protein: a close look
Source: Royal Society of Chemistry journal article supplement (doi:10.1039/b9nj00202b), 2009-01-01

## The complex-formation behaviour of His residues in the fifth Cu<sup>2+</sup> binding site of human Prion protein: a close look

Maurizio Remelli, Daniela Valensin, Dimitri Bacco, Ewa Gralka, Remo Guerrini, Caterina Migliorini, Henryk Kozlowski

### SUPPLEMENTARY DATA

**Table S1.**

Thermodynamic parameters for protonation of PrP<sub>91-114</sub>, PrP<sub>92-100</sub>, PrP<sub>106-113</sub>, in aqueous solution.  $T = 298$  K,  $I = 0.1$  mol dm<sup>-3</sup> (KCl or KNO<sub>3</sub>). Standard deviations are given in parentheses. Charges are omitted for clarity.

Data from F. Berti *et al.*, Chem. Eur. J. 13 (2007) 1991 and M. Remelli *et al.*, Dalton Trans. (2005) 2876.

| Species                | log $\beta$ | log $K_{\text{step}}$ | $-\Delta H^\circ$<br>kJ mol <sup>-1</sup> | $\Delta S^\circ$<br>J K <sup>-1</sup> mol <sup>-1</sup> |
|------------------------|-------------|-----------------------|-------------------------------------------|---------------------------------------------------------|
| PrP <sub>91-114</sub>  |             |                       |                                           |                                                         |
| HL                     | 11.15       | 11.15                 | -                                         | -                                                       |
| H <sub>2</sub> L       | 21.46       | 10.31                 | -                                         | -                                                       |
| H <sub>3</sub> L       | 31.49       | 10.04                 | -                                         | -                                                       |
| H <sub>4</sub> L       | 40.85       | 9.35                  | -                                         | -                                                       |
| H <sub>5</sub> L       | 47.39       | 6.54                  | -                                         | -                                                       |
| H <sub>6</sub> L       | 53.11       | 5.73                  | -                                         | -                                                       |
| PrP <sub>92-100</sub>  |             |                       |                                           |                                                         |
| HL                     | 6.38        | 6.38                  | 25                                        | 38                                                      |
| PrP <sub>106-113</sub> |             |                       |                                           |                                                         |
| HL                     | 10.52       | 10.52                 | 81                                        | -69                                                     |
| H <sub>2</sub> L       | 20.32       | 9.80                  | 111                                       | 16                                                      |
| H <sub>3</sub> L       | 26.48       | 6.16                  | 135                                       | 53                                                      |

**Table S2.**

Thermodynamic parameters for  $\text{Cu}^{2+}$  complex-formation of  $\text{PrP}_{91-114}$ ,  $\text{PrP}_{92-100}$ ,  $\text{PrP}_{106-113}$ , in aqueous solution.  $T = 298 \text{ K}$ ,  $I = 0.1 \text{ mol dm}^{-3}$  (KCl or  $\text{KNO}_3$ ). Standard deviations are given in parentheses. Charges are omitted for clarity.

Data from F. Berti *et al.*, Chem. Eur. J. 13 (2007) 1991 and M. Remelli *et al.*, Dalton Trans. (2005) 2876.

| Species                   | $\log \beta$ | $\log K_{\text{step}}$ | $-\Delta H^\circ$<br>$\text{kJ mol}^{-1}$ | $\Delta S^\circ$<br>$\text{J K}^{-1} \text{mol}^{-1}$ |
|---------------------------|--------------|------------------------|-------------------------------------------|-------------------------------------------------------|
| $\text{PrP}_{91-114}$     |              |                        |                                           |                                                       |
| $\text{CuH}_5\text{L}$    | 51.35        | 5.29                   | -                                         | -                                                     |
| $\text{CuH}_4\text{L}$    | 46.06        | -                      | -                                         | -                                                     |
| $\text{CuH}_2\text{L}$    | 34.18        | 6.56                   | -                                         | -                                                     |
| $\text{CuHL}$             | 27.62        | 7.40                   | -                                         | -                                                     |
| $\text{CuL}$              | 20.22        | 8.78                   | -                                         | -                                                     |
| $\text{CuH}_{-1}\text{L}$ | 11.44        | -                      | -                                         | -                                                     |
| $\text{CuH}_{-3}\text{L}$ | -8.66        | -                      | -                                         | -                                                     |
| $\text{PrP}_{92-100}$     |              |                        |                                           |                                                       |
| $\text{CuL}$              | 3.85         | 6.25                   | 20                                        | 6                                                     |
| $\text{CuH}_{-1}\text{L}$ | -2.40        | 5.82                   | 8                                         | -72                                                   |
| $\text{CuH}_{-2}\text{L}$ | -8.22        | 7.55                   | -39                                       | -27                                                   |
| $\text{CuH}_{-3}\text{L}$ | -15.77       | 9.51                   | -65                                       | -85                                                   |
| $\text{CuH}_{-4}\text{L}$ | -25.28       | -                      | -88                                       | -187                                                  |
| $\text{PrP}_{106-113}$    |              |                        |                                           |                                                       |
| $\text{CuH}_2\text{L}$    | 23.84        | 6.19                   | 161                                       | -82                                                   |
| $\text{CuHL}$             | 17.65        | 5.04                   | 93                                        | 27                                                    |
| $\text{CuL}$              | 12.61        | 7.71                   | 82                                        | -33                                                   |
| $\text{CuH}_{-1}\text{L}$ | 4.90         | 9.85                   | 53                                        | -84                                                   |
| $\text{CuH}_{-2}\text{L}$ | -4.95        | 10.64                  | 20                                        | -162                                                  |
| $\text{CuH}_{-3}\text{L}$ | -15.59       | 11.81                  | -48                                       | -138                                                  |
| $\text{CuH}_{-4}\text{L}$ | -27.40       | -                      | -                                         | -                                                     |

**Table S3.**

Spectroscopic parameters for Cu<sup>2+</sup> complex-formation of PrP<sub>92-113</sub>, PrP<sub>92-100</sub>, PrP<sub>106-113</sub> analogues, in aqueous solution. Molar absorptivity is always referred to the total molar concentration of the Cu<sup>2+</sup> ion. *T* = 298 K, *I* = 0.1 mol dm<sup>-3</sup> (KCl). Charges are omitted for clarity.

| (H96A)PrP <sub>92-113</sub>     |                                                                      |      |                                                                        |       |                                               | (H111A)PrP <sub>92-113</sub> |                                 |                                                                      |      |                                                                        |       |                                               |      |
|---------------------------------|----------------------------------------------------------------------|------|------------------------------------------------------------------------|-------|-----------------------------------------------|------------------------------|---------------------------------|----------------------------------------------------------------------|------|------------------------------------------------------------------------|-------|-----------------------------------------------|------|
| Species (pH)                    | UV-Vis<br>$\lambda/\text{nm}$ $\epsilon/\text{M}^{-1}\text{cm}^{-1}$ |      | CD<br>$\lambda/\text{nm}$ $\Delta\epsilon/\text{M}^{-1}\text{cm}^{-1}$ |       | EPR<br>$A_{\text{H}}/\text{G}$ $g_{\text{H}}$ |                              | Species                         | UV-Vis<br>$\lambda/\text{nm}$ $\epsilon/\text{M}^{-1}\text{cm}^{-1}$ |      | CD<br>$\lambda/\text{nm}$ $\Delta\epsilon/\text{M}^{-1}\text{cm}^{-1}$ |       | EPR<br>$A_{\text{H}}/\text{G}$ $g_{\text{H}}$ |      |
| CuH <sub>4</sub> L<br>(pH 5.0)  | 785                                                                  | 31   | 292                                                                    | -0.17 | 123                                           | 2.52                         | CuH <sub>4</sub> L<br>(pH 5.5)  | 795                                                                  | 15   | 264                                                                    | 0.13  | 142                                           | 2.44 |
|                                 |                                                                      |      | 444                                                                    | 0.11  |                                               |                              |                                 |                                                                      |      | 297                                                                    | -0.06 |                                               |      |
| CuH <sub>2</sub> L<br>(pH 6.5)  | 617                                                                  | 118  | 253                                                                    | 5.19  | 168                                           | 2.23                         | CuH <sub>3</sub> L<br>(pH 6.0)  | 780                                                                  | 16   | 340                                                                    | 0.02  | 142                                           | 2.45 |
|                                 |                                                                      |      | 326                                                                    | -0.44 |                                               |                              |                                 |                                                                      |      | 526                                                                    | 0.01  |                                               |      |
|                                 |                                                                      |      | 385                                                                    | 0.14  |                                               |                              |                                 |                                                                      |      | 258                                                                    | 0.62  |                                               |      |
|                                 |                                                                      |      | 532                                                                    | 0.31  |                                               |                              |                                 |                                                                      |      | 305                                                                    | -0.08 |                                               |      |
| CuHL<br>(pH 7.5)                | 574                                                                  | 133  | 254                                                                    | 7.05  | 178                                           | 2.22                         | CuH <sub>2</sub> L<br>(pH 7.0)  | 628                                                                  | 55   | 343                                                                    | 0.13  | n.d.                                          |      |
|                                 |                                                                      |      | 317                                                                    | 0.23  |                                               |                              |                                 |                                                                      |      | 514                                                                    | 0.05  |                                               |      |
|                                 |                                                                      |      | 345                                                                    | -0.06 |                                               |                              |                                 |                                                                      |      | 626                                                                    | -0.05 |                                               |      |
|                                 |                                                                      |      | 390                                                                    | 0.13  |                                               |                              |                                 |                                                                      |      | 271                                                                    | 1.46  |                                               |      |
|                                 |                                                                      |      | 493                                                                    | -0.39 |                                               |                              |                                 |                                                                      |      | 322                                                                    | -0.09 |                                               |      |
| CuL<br>(pH 9.0)                 | 534                                                                  | 163  | 644                                                                    | 0.57  | 192                                           | 2.20                         | CuHL<br>(pH 8.5)                | 576                                                                  | 97   | 379                                                                    | 0.11  | 175                                           | 2.22 |
|                                 |                                                                      |      | 257                                                                    | 7.30  |                                               |                              |                                 |                                                                      |      | 489                                                                    | 0.04  |                                               |      |
|                                 |                                                                      |      | 293                                                                    | -0.05 |                                               |                              |                                 |                                                                      |      | 616                                                                    | -0.44 |                                               |      |
|                                 |                                                                      |      | 318                                                                    | 1.20  |                                               |                              |                                 |                                                                      |      | 276                                                                    | 2.22  |                                               |      |
|                                 |                                                                      |      | 359                                                                    | -0.06 |                                               |                              |                                 |                                                                      |      | 335                                                                    | -0.32 |                                               |      |
|                                 |                                                                      |      | 404                                                                    | 0.06  |                                               |                              |                                 |                                                                      |      | 391                                                                    | 0.16  |                                               |      |
|                                 |                                                                      |      | 497                                                                    | -1.11 |                                               |                              |                                 |                                                                      |      | 612                                                                    | -0.84 |                                               |      |
| CuH <sub>1</sub> L<br>(pH 10.0) | 530                                                                  | 175  | 634                                                                    | 1.10  | 192                                           | 2.20                         | CuL<br>(pH 9.5)                 | 570                                                                  | 105  | 275                                                                    | 2.57  | 204                                           | 2.19 |
|                                 |                                                                      |      | 256                                                                    | 7.58  |                                               |                              |                                 |                                                                      |      | 339                                                                    | -0.28 |                                               |      |
|                                 |                                                                      |      | 293                                                                    | -0.11 |                                               |                              |                                 |                                                                      |      | 393                                                                    | 0.16  |                                               |      |
|                                 |                                                                      |      | 318                                                                    | 1.32  |                                               |                              |                                 |                                                                      |      | 601                                                                    | -0.95 |                                               |      |
|                                 |                                                                      |      | 363                                                                    | -0.06 |                                               |                              |                                 |                                                                      |      | 259                                                                    | 2.59  |                                               |      |
|                                 |                                                                      |      | 401                                                                    | 0.07  |                                               |                              |                                 |                                                                      |      | 336                                                                    | -0.18 |                                               |      |
| CuH <sub>2</sub> L<br>(pH 10.5) | n.d.                                                                 | n.d. | 635                                                                    | 1.16  | n.d.                                          | n.d.                         | CuH <sub>1</sub> L<br>(pH 10.0) | 566                                                                  | 113  | 393                                                                    | 0.10  | 209                                           | 2.19 |
|                                 |                                                                      |      | 586                                                                    | -0.93 |                                               |                              |                                 |                                                                      |      | 586                                                                    | -0.93 |                                               |      |
|                                 |                                                                      |      | 257                                                                    | 7.81  |                                               |                              |                                 |                                                                      |      | 253                                                                    | 3.27  |                                               |      |
|                                 |                                                                      |      | 293                                                                    | -0.28 |                                               |                              |                                 |                                                                      |      | 316                                                                    | -0.36 |                                               |      |
| CuH <sub>3</sub> L<br>(pH 11.0) | 528                                                                  | 175  | 319                                                                    | 1.32  | 192                                           | 2.20                         | CuH <sub>2</sub> L<br>(pH 11.0) | 556                                                                  | 121  | 393                                                                    | 0.05  | 212                                           | 2.19 |
|                                 |                                                                      |      | 399                                                                    | 0.07  |                                               |                              |                                 |                                                                      |      | 581                                                                    | -0.95 |                                               |      |
|                                 |                                                                      |      | 498                                                                    | -1.31 |                                               |                              |                                 |                                                                      |      | 253                                                                    | 3.27  |                                               |      |
|                                 |                                                                      |      | 637                                                                    | 1.19  |                                               |                              |                                 |                                                                      |      | 316                                                                    | -0.36 |                                               |      |
|                                 |                                                                      |      |                                                                        |       |                                               |                              |                                 |                                                                      |      | 393                                                                    | 0.05  |                                               |      |
|                                 |                                                                      |      |                                                                        |       |                                               | CuH <sub>3</sub> L           | n.d.                            |                                                                      | n.d. |                                                                        | n.d.  |                                               |      |

| <b>(H96His-N<sup>T</sup>-Me)PrP<sub>92-113</sub></b> |                     |                                        |                     |                                              |                   | <b>(H111His-N<sup>T</sup>-Me)PrP<sub>92-113</sub></b> |                |                     |                                        |                     |                                              |                   |                 |
|------------------------------------------------------|---------------------|----------------------------------------|---------------------|----------------------------------------------|-------------------|-------------------------------------------------------|----------------|---------------------|----------------------------------------|---------------------|----------------------------------------------|-------------------|-----------------|
| <b>pH</b>                                            | <b>UV-Vis</b>       |                                        | <b>CD</b>           |                                              | <b>EPR</b>        |                                                       | <b>pH</b>      | <b>UV-Vis</b>       |                                        | <b>CD</b>           |                                              | <b>EPR</b>        |                 |
|                                                      | $\lambda/\text{nm}$ | $\epsilon/\text{M}^{-1}\text{cm}^{-1}$ | $\lambda/\text{nm}$ | $\Delta\epsilon/\text{M}^{-1}\text{cm}^{-1}$ | $A_{\parallel}/G$ | $g_{\parallel}$                                       |                | $\lambda/\text{nm}$ | $\epsilon/\text{M}^{-1}\text{cm}^{-1}$ | $\lambda/\text{nm}$ | $\Delta\epsilon/\text{M}^{-1}\text{cm}^{-1}$ | $A_{\parallel}/G$ | $g_{\parallel}$ |
| <b>pH 4.0</b>                                        | 803                 | 29                                     | 266                 | 0.24                                         | n.d.              |                                                       | <b>pH 4.0</b>  | 809                 | 29                                     | 267                 | 0.18                                         | 120               | 2.42            |
|                                                      |                     |                                        | 292                 | -0.26                                        |                   |                                                       |                |                     |                                        | 305                 | -0.10                                        |                   |                 |
| <b>pH 5.0</b>                                        | 800                 | 33                                     | 265                 | 0.28                                         | n.d.              |                                                       | <b>pH 5.0</b>  | 798                 | 23                                     | 264                 | 0.24                                         | 120               | 2.42            |
|                                                      |                     |                                        | 293                 | -0.20                                        |                   |                                                       |                |                     |                                        | 305                 | -0.10                                        |                   |                 |
| <b>pH 5.5</b>                                        | 795                 | 30                                     | 255                 | 1.60                                         | n.d.              |                                                       | <b>pH 5.5</b>  | 768                 | 31                                     | 258                 | 1.74                                         | 120               | 2.42            |
|                                                      |                     |                                        | 314                 | -0.14                                        |                   |                                                       |                |                     |                                        | 317                 | -0.17                                        |                   |                 |
|                                                      |                     |                                        | 425                 | -0.02                                        |                   |                                                       |                |                     |                                        | 386                 | 0.01                                         |                   |                 |
|                                                      |                     |                                        | 527                 | 0.07                                         |                   |                                                       |                |                     |                                        | 523                 | 0.08                                         |                   |                 |
|                                                      |                     |                                        | 611                 | -0.05                                        |                   |                                                       |                |                     |                                        | 610                 | -0.04                                        |                   |                 |
| <b>pH 6.0</b>                                        | 632                 | 59                                     | 255                 | 4.48                                         | n.d.              |                                                       | <b>pH 6.0</b>  | 635                 | 51                                     | 255                 | 4.74                                         | 120               | 2.42            |
|                                                      |                     |                                        | 317                 | -0.35                                        |                   |                                                       |                |                     |                                        | 321                 | -0.31                                        |                   |                 |
|                                                      |                     |                                        | 376                 | 0.04                                         |                   |                                                       |                |                     |                                        | 386                 | 0.05                                         |                   |                 |
|                                                      |                     |                                        | 435                 | -0.02                                        |                   |                                                       |                |                     |                                        | 526                 | 0.23                                         |                   |                 |
|                                                      |                     |                                        | 525                 | 0.23                                         |                   |                                                       |                |                     |                                        | 613                 | -0.11                                        |                   |                 |
| <b>pH 6.5</b>                                        | 619                 | 100                                    | 254                 | 6.65                                         | n.d.              |                                                       | <b>pH 6.5</b>  | 621                 | 101                                    | 254                 | 6.23                                         | 171               | 2.22            |
|                                                      |                     |                                        | 316                 | -0.46                                        |                   |                                                       |                |                     |                                        | 316                 | -0.34                                        |                   |                 |
|                                                      |                     |                                        | 377                 | 0.06                                         |                   |                                                       |                |                     |                                        | 383                 | 0.06                                         |                   |                 |
|                                                      |                     |                                        | 434                 | -0.01                                        |                   |                                                       |                |                     |                                        | 525                 | 0.28                                         |                   |                 |
|                                                      |                     |                                        | 524                 | 0.33                                         |                   |                                                       |                |                     |                                        | 606                 | -0.15                                        |                   |                 |
| <b>pH 7.0</b>                                        | 611                 | 120                                    | 253                 | 6.79                                         | n.d.              |                                                       | <b>pH 7.0</b>  | 613                 | 115                                    | 254                 | 6.43                                         | 175               | 2.22            |
|                                                      |                     |                                        | 313                 | -0.47                                        |                   |                                                       |                |                     |                                        | 315                 | -0.29                                        |                   |                 |
|                                                      |                     |                                        | 377                 | 0.05                                         |                   |                                                       |                |                     |                                        | 381                 | 0.04                                         |                   |                 |
|                                                      |                     |                                        | 433                 | -0.01                                        |                   |                                                       |                |                     |                                        | 440                 | -0.02                                        |                   |                 |
|                                                      |                     |                                        | 521                 | 0.30                                         |                   |                                                       |                |                     |                                        | 523                 | 0.22                                         |                   |                 |
| <b>pH 7.5</b>                                        | 602                 | 124                                    | 254                 | 6.30                                         | n.d.              |                                                       | <b>pH 7.5</b>  | 601                 | 121                                    | 255                 | 6.11                                         | 175               | 2.22            |
|                                                      |                     |                                        | 310                 | -0.46                                        |                   |                                                       |                |                     |                                        | 307                 | -0.23                                        |                   |                 |
|                                                      |                     |                                        | 379                 | 0.024                                        |                   |                                                       |                |                     |                                        | 330                 | -0.09                                        |                   |                 |
|                                                      |                     |                                        | 436                 | -0.02                                        |                   |                                                       |                |                     |                                        | 385                 | 0.02                                         |                   |                 |
|                                                      |                     |                                        | 518                 | 0.22                                         |                   |                                                       |                |                     |                                        | 472                 | -0.06                                        |                   |                 |
| <b>pH 8.0</b>                                        | 587                 | 130                                    | 254                 | 5.90                                         | n.d.              |                                                       | <b>pH 8.0</b>  | 578                 | 126                                    | 255                 | 5.65                                         | 175               | 2.22            |
|                                                      |                     |                                        | 302                 | -0.47                                        |                   |                                                       |                |                     |                                        | 301                 | -0.23                                        |                   |                 |
|                                                      |                     |                                        | 350                 | -0.12                                        |                   |                                                       |                |                     |                                        | 327                 | 0.03                                         |                   |                 |
|                                                      |                     |                                        | 472                 | -0.07                                        |                   |                                                       |                |                     |                                        | 353                 | -0.08                                        |                   |                 |
|                                                      |                     |                                        | 517                 | 0.07                                         |                   |                                                       |                |                     |                                        | 478                 | -0.13                                        |                   |                 |
| <b>pH 8.5</b>                                        | 562                 | 138                                    | 255                 | 5.63                                         | 180               | 2.20                                                  | <b>pH 8.5</b>  | 556                 | 144                                    | 256                 | 5.27                                         | 179               | 2.20            |
|                                                      |                     |                                        | 300                 | -0.40                                        |                   |                                                       |                |                     |                                        | 300                 | -0.31                                        |                   |                 |
|                                                      |                     |                                        | 354                 | -0.13                                        |                   |                                                       |                |                     |                                        | 325                 | 0.14                                         |                   |                 |
|                                                      |                     |                                        | 475                 | -0.12                                        |                   |                                                       |                |                     |                                        | 357                 | -0.10                                        |                   |                 |
|                                                      |                     |                                        | 574                 | -0.42                                        |                   |                                                       |                |                     |                                        | 481                 | -0.21                                        |                   |                 |
| <b>pH 9.0</b>                                        | 549                 | 147                                    | 255                 | 5.43                                         | 182               | 2.20                                                  | <b>pH 9.0</b>  | 547                 | 153                                    | 256                 | 5.11                                         | 186               | 2.20            |
|                                                      |                     |                                        | 299                 | -0.50                                        |                   |                                                       |                |                     |                                        | 298                 | -0.31                                        |                   |                 |
|                                                      |                     |                                        | 327                 | 0.05                                         |                   |                                                       |                |                     |                                        | 325                 | 0.21                                         |                   |                 |
|                                                      |                     |                                        | 356                 | -0.15                                        |                   |                                                       |                |                     |                                        | 358                 | -0.11                                        |                   |                 |
|                                                      |                     |                                        | 475                 | -0.17                                        |                   |                                                       |                |                     |                                        | 485                 | -0.25                                        |                   |                 |
| <b>pH 10.0</b>                                       | 541                 | 170                                    | 256                 | 5.23                                         | 180               | 2.18                                                  | <b>pH 10.0</b> | 539                 | 167                                    | 257                 | 5.05                                         | 195               | 2.19            |
|                                                      |                     |                                        | 298                 | -0.59                                        |                   |                                                       |                |                     |                                        | 297                 | -0.40                                        |                   |                 |
|                                                      |                     |                                        | 326                 | 0.10                                         |                   |                                                       |                |                     |                                        | 324                 | 0.25                                         |                   |                 |
|                                                      |                     |                                        | 356                 | -0.14                                        |                   |                                                       |                |                     |                                        | 361                 | -0.11                                        |                   |                 |
|                                                      |                     |                                        | 481                 | -0.20                                        |                   |                                                       |                |                     |                                        | 484                 | -0.26                                        |                   |                 |
| <b>pH 11.0</b>                                       | 542                 | 173                                    | 255                 | 5.38                                         | 192               | 2.20                                                  | <b>pH 11.0</b> | 536                 | 177                                    | 257                 | 5.15                                         | 196               | 2.19            |
|                                                      |                     |                                        | 297                 | -0.87                                        |                   |                                                       |                |                     |                                        | 297                 | -0.55                                        |                   |                 |
|                                                      |                     |                                        | 330                 | 0.08                                         |                   |                                                       |                |                     |                                        | 326                 | 0.33                                         |                   |                 |
|                                                      |                     |                                        | 361                 | -0.11                                        |                   |                                                       |                |                     |                                        | 365                 | -0.08                                        |                   |                 |
|                                                      |                     |                                        | 480                 | -0.17                                        |                   |                                                       |                |                     |                                        | 487                 | -0.31                                        |                   |                 |
|                                                      |                     |                                        | 574                 | -0.63                                        |                   |                                                       |                |                     | 563                                    | -0.53               |                                              |                   |                 |
|                                                      |                     |                                        | 661                 | 0.31                                         |                   |                                                       |                |                     | 658                                    | 0.33                |                                              |                   |                 |

| <b>(H96His-N<sup>T</sup>-Me)PrP<sub>92-100</sub></b> |                     |                                        |                     |                                              |                   | <b>(H111His-N<sup>T</sup>-Me)PrP<sub>106-113</sub></b> |                         |                     |                                        |                     |                                              |                   |                 |     |      |
|------------------------------------------------------|---------------------|----------------------------------------|---------------------|----------------------------------------------|-------------------|--------------------------------------------------------|-------------------------|---------------------|----------------------------------------|---------------------|----------------------------------------------|-------------------|-----------------|-----|------|
| Species                                              | UV-Vis              |                                        | CD                  |                                              | EPR               |                                                        | Species                 | UV-Vis              |                                        | CD                  |                                              | EPR               |                 |     |      |
|                                                      | $\lambda/\text{nm}$ | $\epsilon/\text{M}^{-1}\text{cm}^{-1}$ | $\lambda/\text{nm}$ | $\Delta\epsilon/\text{M}^{-1}\text{cm}^{-1}$ | $A_{\parallel}/G$ | $g_{\parallel}$                                        |                         | $\lambda/\text{nm}$ | $\epsilon/\text{M}^{-1}\text{cm}^{-1}$ | $\lambda/\text{nm}$ | $\Delta\epsilon/\text{M}^{-1}\text{cm}^{-1}$ | $A_{\parallel}/G$ | $g_{\parallel}$ |     |      |
| <b>CuH<sub>1</sub>L</b>                              | 617                 | 35                                     | 259                 | 0.64                                         | 119               | 2.41                                                   | <b>CuHL</b>             | n.d.                | 258                                    | 2.83                | 119                                          | 2.41              |                 |     |      |
|                                                      |                     |                                        | 306                 | -0.04                                        |                   |                                                        |                         |                     | 332                                    | -0.34               |                                              |                   |                 |     |      |
|                                                      |                     |                                        | 341                 | 0.05                                         |                   |                                                        |                         |                     | 530                                    | 0.20                |                                              |                   |                 |     |      |
| <b>CuH<sub>2</sub>L</b>                              | 600                 | 70                                     | 251                 | 3.68                                         | 170               | 2.23                                                   | <b>CuL</b>              | 617                 | 79                                     | 249                 | 8.32                                         | 170               | 2.22            |     |      |
|                                                      |                     |                                        | 306                 | -0.63                                        |                   |                                                        |                         |                     |                                        | 337                 | -0.61                                        |                   |                 |     |      |
|                                                      |                     |                                        | 346                 | 0.48                                         |                   |                                                        |                         |                     |                                        | 388                 | 0.09                                         |                   |                 |     |      |
|                                                      |                     |                                        | 503                 | 0.40                                         |                   |                                                        |                         |                     |                                        | 459                 | -0.04                                        |                   |                 |     |      |
|                                                      |                     |                                        | 601                 | -0.60                                        |                   |                                                        |                         |                     |                                        | 536                 | 0.30                                         |                   |                 |     |      |
| <b>CuH<sub>3</sub>L</b>                              | 555                 | 110                                    | 247                 | 2.46                                         | 180               | 2.22                                                   | <b>CuH<sub>1</sub>L</b> | 568                 | 100                                    | 256                 | 7.47                                         | 182               | 2.21            |     |      |
|                                                      |                     |                                        | 309                 | -1.48                                        |                   |                                                        |                         |                     |                                        | 316                 | 1.15                                         |                   |                 |     |      |
|                                                      |                     |                                        | 494                 | 0.91                                         |                   |                                                        |                         |                     |                                        | 359                 | -0.11                                        |                   |                 |     |      |
|                                                      |                     |                                        | 589                 | -1.46                                        |                   |                                                        |                         |                     |                                        | 494                 | -1.03                                        |                   |                 |     |      |
| <b>CuH<sub>4</sub>L</b>                              | 550                 | 112                                    | 246                 | 2.79                                         | 196               | 2.20                                                   | <b>CuH<sub>2</sub>L</b> | 549                 | 108                                    | 257                 | 7.65                                         | 192               | 2.20            |     |      |
|                                                      |                     |                                        | 278                 | 0.17                                         |                   |                                                        |                         |                     |                                        | 317                 | 1.46                                         |                   |                 |     |      |
|                                                      |                     |                                        | 310                 | -1.77                                        |                   |                                                        |                         |                     |                                        | 363                 | -0.10                                        |                   |                 |     |      |
|                                                      |                     |                                        | 363                 | -0.04                                        |                   |                                                        |                         |                     |                                        | 495                 | -1.27                                        |                   |                 |     |      |
|                                                      |                     |                                        | 493                 | 0.80                                         |                   |                                                        | 627                     | 0.94                | <b>CuH<sub>3</sub>L</b>                | 543                 | 111                                          | 257               | 7.94            | 195 | 2.19 |
|                                                      |                     |                                        | 587                 | -1.54                                        |                   |                                                        | 319                     | 1.56                |                                        |                     |                                              |                   |                 |     |      |
|                                                      |                     |                                        |                     |                                              |                   |                                                        | 365                     | -0.07               |                                        |                     |                                              |                   |                 |     |      |
|                                                      |                     |                                        |                     |                                              |                   |                                                        |                         |                     | 496                                    | -1.44               |                                              |                   |                 |     |      |
|                                                      |                     |                                        |                     |                                              |                   |                                                        |                         |                     | 627                                    | 1.03                |                                              |                   |                 |     |      |

**Fig. S1**

Proton paramagnetic relaxation contributions ( $R_{1p}$ ) of (H96A)PrP<sub>92-113</sub>  $\alpha$  protons calculated in presence of 0.1 Cu<sup>2+</sup> equivalents, T=298 K, pH 6.5 and by using  $p_f = 1$  (solid squares) or  $p_f = 0.9$  (open circles).

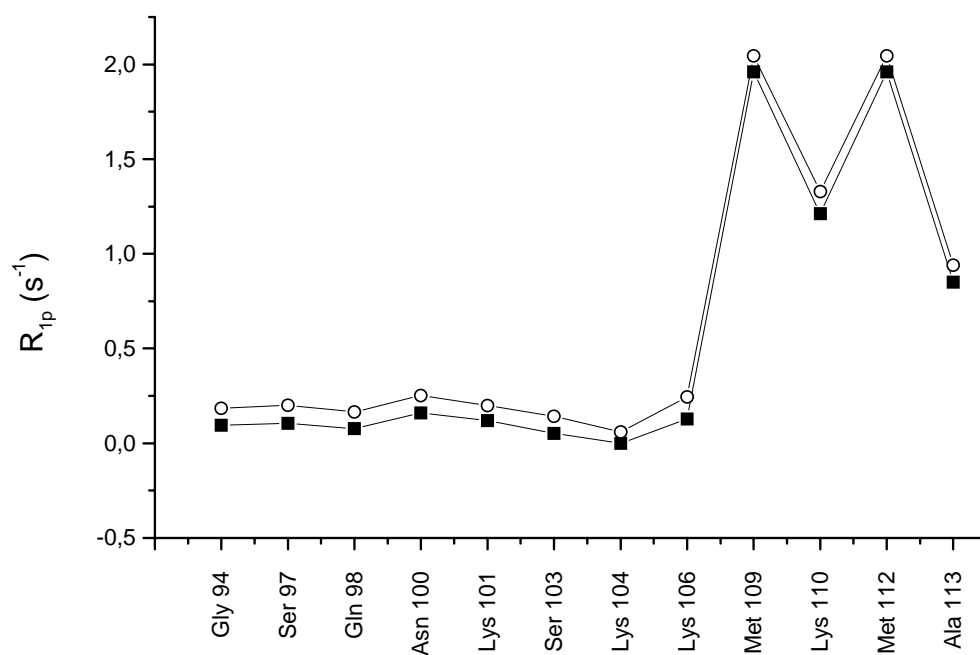

### Fig. S2

Comparison between proton paramagnetic relaxation contributions ( $R_{1p}$ ) of (A) (H96His-N<sup>T</sup>-Me)PrP<sub>92-113</sub> and (H96His-N<sup>T</sup>-Me)PrP<sub>92-100</sub>; (B) (H111His-N<sup>T</sup>-Me)PrP<sub>92-113</sub> and (H111His-N<sup>T</sup>-Me)PrP<sub>106-113</sub> calculated in presence of 0.1 Cu<sup>2+</sup> equivalents, T=298 K, pH 6.5.

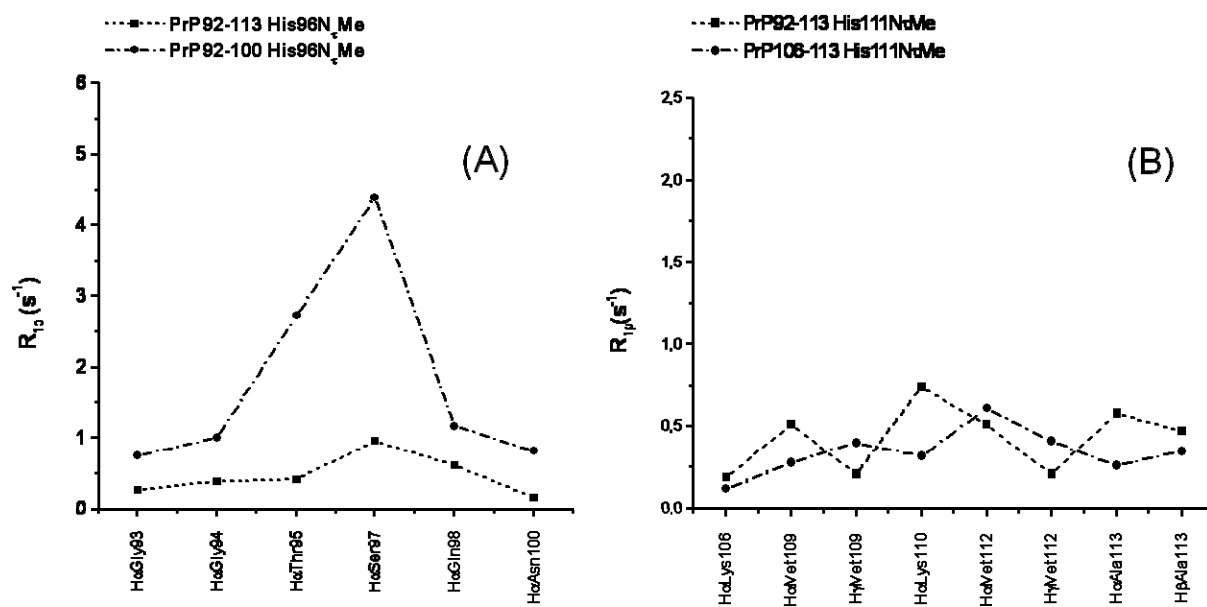

Supplement: b9nj00202b.pdf [file b9nj00202b.pdf]
